# Supplementary material
Source: MDPI journal article supplement (https://www.mdpi.com/2311-5629/7/1/29)
Supplement: s1 [file s1]

# Supplementary information

## Carbide-Derived Carbons: WAXS and Raman Spectra for Detailed Structural Analysis

Riinu Härmäs<sup>1</sup>, Rasmus Palm<sup>1</sup>, Heisi Kurig<sup>1</sup>, Laura Puusepp<sup>1</sup>, Torben Pfaff<sup>2</sup>, Tavo Romann<sup>1</sup>, Jaan Aruväli<sup>3</sup>, Indrek Tallo<sup>1</sup>, Thomas Thomberg<sup>1</sup>, Alar Jänes<sup>1</sup> and Enn Lust<sup>1,\*</sup>

<sup>1</sup> Institute of Chemistry, University of Tartu; chemistry@ut.ee, Ravila 14a, 50411 Tartu, Estonia

<sup>2</sup> Institute of Physical Chemistry, Justus Liebig University, Heinrich-Buff-Ring 17, 35392 Giessen, Germany

<sup>3</sup> Institute of Ecology and Earth Sciences, University of Tartu; geo@ut.ee, Ravila 14a, 50411 Tartu, Estonia

\* Correspondence: enn.lust@ut.ee; Tel.: +372-737-5165

### 1. WAXS patterns

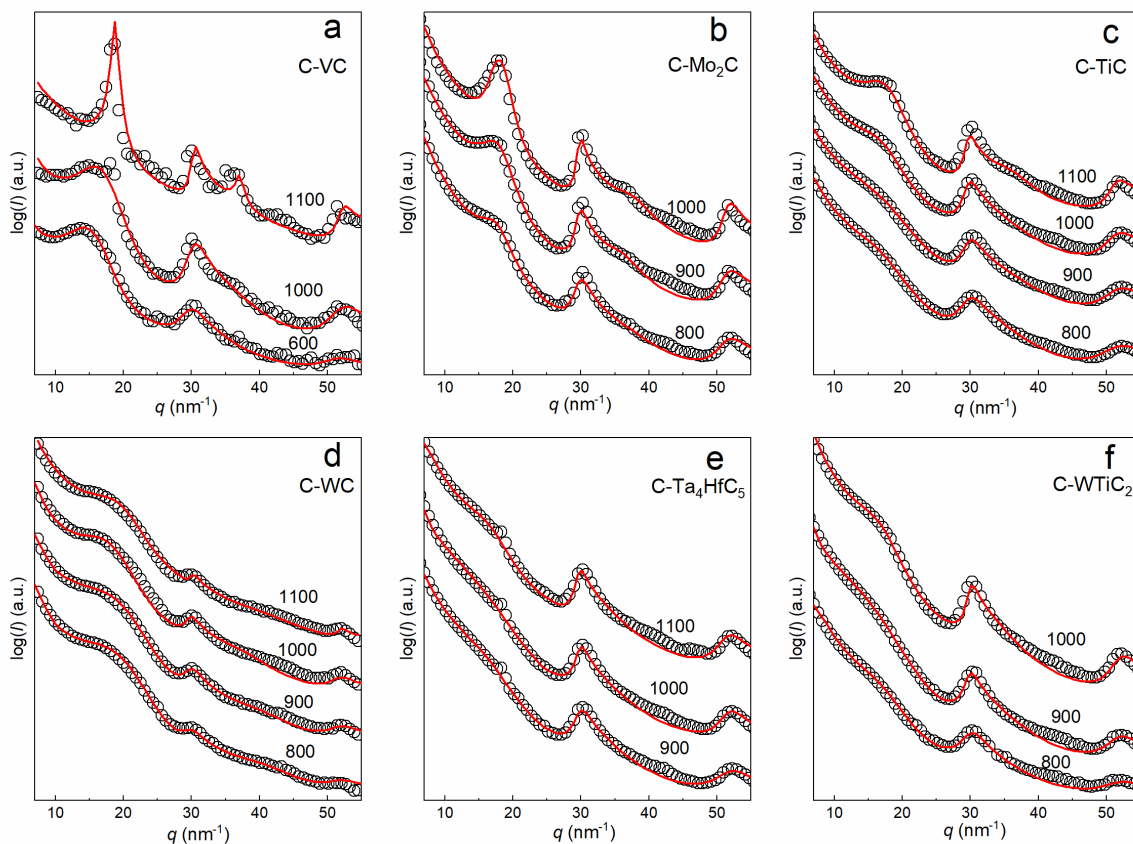

**Figure 1.** Wide-angle X-ray scattering data (spheres) of different CDCs (noted in Figure) and fit curve (solid line), of (a) C-VC, (b) C-Mo<sub>2</sub>C, (c) C-TiC, (d) C-WC, (e) C-Ta<sub>4</sub>HfC<sub>5</sub> and (f) C-WTiC<sub>2</sub> synthesized at different  $T_{\text{syn}}$  (noted in Fig.). The scattering vector modulus,  $q$ , is defined as  $q = 4\pi \sin(\theta)/\lambda$ , where  $2\theta$  is the scattering angle.

**Table 1.** Parameters derived from WAXS patterns for some CDCs.  $L_a$  – average graphene layer extent,  $\langle l \rangle$  – average chord length,  $l_{\text{cc}}$  – average C-C bond length,  $\sigma_1$  – standard deviation of the first-neighbor

distribution,  $\langle N \rangle$  – average number of graphene layers per stack,  $L_c$  – average stacking size,  $\kappa_c$  – polydispersity of stack height,  $a_3$  – average interlayer spacing,  $\sigma_3$  – standard deviation of interlayer spacing.

| carbide                          | $T_{\text{syn}}, ^\circ\text{C}$ | $L_a, \text{\AA}$ | $\langle l \rangle, \text{\AA}$ | $l_{cc}, \text{\AA}$ | $\sigma_l, \text{\AA}$ | $\langle N \rangle$ | $L_c, \text{\AA}$ | $\kappa_c, \text{\AA}$ | $a_3, \text{\AA}$ | $\sigma_3, \text{\AA}$ |
|----------------------------------|----------------------------------|-------------------|---------------------------------|----------------------|------------------------|---------------------|-------------------|------------------------|-------------------|------------------------|
| Error ( $\pm\%$ )                |                                  | 10–30             | 10–15                           | 0.4–1.7              | 3–21                   | 7–20                | 5–18              | 10–15                  | 1–5               | 20                     |
| Mo <sub>2</sub> C                | 800                              | 38                | 31                              | 1.412                | 0.16                   | 1.05                | 12.8              | 2.4                    | 3.64              | 0.61                   |
|                                  | 900                              | 63                | 50                              | 1.412                | 0.15                   | 0.79                | 7.7               | 1.8                    | 3.54              | 0.40                   |
|                                  | 1000                             | 83                | 67                              | 1.410                | 0.12                   | 6.74                | 26.5              | 0.1                    | 3.51              | 0.48                   |
| TiC                              | 800                              | 26                | 21                              | 1.410                | 0.21                   | 1.08                | 5.0               | 0.4                    | 3.65              | 0.38                   |
|                                  | 900                              | 38                | 31                              | 1.410                | 0.19                   | 1.00                | 4.8               | 0.3                    | 3.65              | 0.633                  |
|                                  | 1000                             | 56                | 44                              | 1.414                | 0.18                   | 0.97                | 5.9               | 0.7                    | 3.65              | 0.39                   |
|                                  | 1100                             | 63                | 50                              | 1.414                | 0.14                   | 0.83                | 8.8               | 0.5                    | 3.73              | 0.88                   |
| VC                               | 600                              | 25                | 20                              | 1.42                 | 0.20                   | 1.51                | 8.2               | 0.4                    | 3.95              | 0.51                   |
|                                  | 1000                             | 29                | 24                              | 1.41                 | 0.18                   | 1.70                | 9.8               | 0.5                    | 3.87              | 0.73                   |
|                                  | 1100                             | 63                | 50                              | 1.406                | 0.11                   | 0.09                | 31.4              | 100.0                  | 3.43              | 0.11                   |
| WC                               | 800                              | 28                | 22                              | 1.411                | 0.16                   | 1.40                | 5.5               | 0.2                    | 3.14              | 0.57                   |
|                                  | 900                              | 33                | 27                              | 1.409                | 0.17                   | 1.36                | 5.3               | 0.2                    | 3.14              | 0.48                   |
|                                  | 1000                             | 45                | 36                              | 1.411                | 0.15                   | 1.90                | 7.5               | 0.1                    | 3.47              | 0.21                   |
|                                  | 1100                             | 50                | 40                              | 1.421                | 0.04                   | 1.17                | 5.6               | 0.5                    | 3.18              | 0.02                   |
| WTiC <sub>2</sub>                | 800                              | 26                | 21                              | 1.405                | 0.22                   | 0.66                | 3.7               | 0.6                    | 3.54              | 0.24                   |
|                                  | 900                              | 38                | 31                              | 1.408                | 0.18                   | 1.36                | 6.9               | 0.1                    | 4.53              | 2.00                   |
|                                  | 1000                             | 71                | 57                              | 1.400                | 0.16                   | 1.02                | 5.6               | 0.5                    | 3.69              | 0.00                   |
| Ta <sub>4</sub> HfC <sub>5</sub> | 900                              | 45                | 36                              | 1.407                | 0.19                   | 0.86                | 4.3               | 0.3                    | 3.76              | 0.00                   |
|                                  | 1000                             | 56                | 44                              | 1.409                | 0.16                   | 1.21                | 5.2               | 0.1                    | 3.80              | 0.01                   |
|                                  | 1100                             | 63                | 50                              | 1.414                | 0.17                   | 0.53                | 4.0               | 1.0                    | 3.75              | 0.03                   |

Parameter  $\kappa_a$ , polydispersity of chord length, was fixed to 0.25; the lower bound for  $a_{3,\text{min}}$  was set to 3  $\text{\AA}$ , since smaller interlayer spacing are physically unlikely. The parameter for thermal motion,  $u_3$ , was fixed to 0, as larger values can contribute to the background of the scattering curve. In order to estimate the uncertainties of the calculated parameters, one parameter was changed in CarbX in small steps until the fit quality diminished as seen by emerging fit curve regions exhibiting systematic deviation from the data. In this manner the minimum and maximum values for parameters were obtained and the difference was divided by the average to calculate the percentage.

## 2. Raman spectra

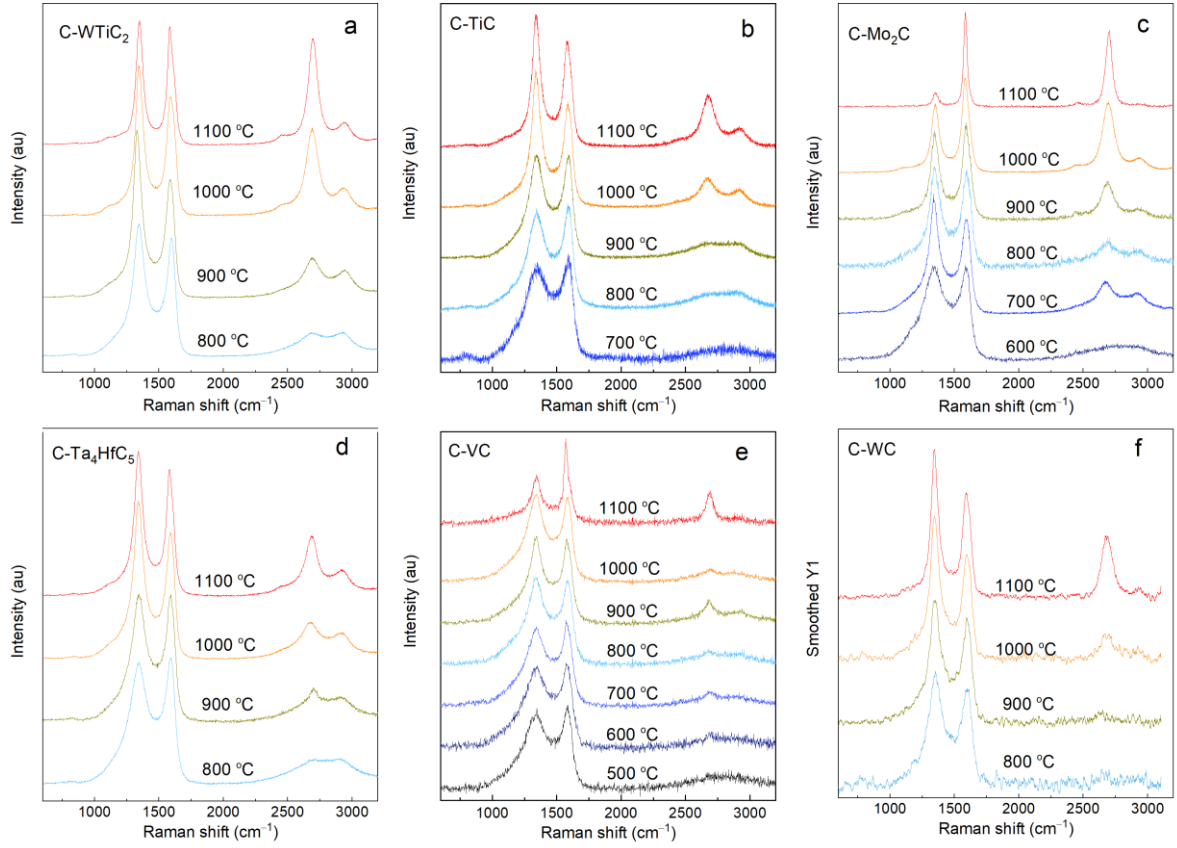

**Figure S2.** The Raman spectra of (a) C-WTiC<sub>2</sub>, (b) C-TiC, (c) C-Mo<sub>2</sub>C, (d) C-Ta<sub>4</sub>HfC<sub>5</sub>, (e) C-VC and (f) C-WC synthesized at different  $T_{\text{syn}}$  (noted in Fig.) and measured with excitation laser wavelength 514 nm (laser energy 2.41 eV).

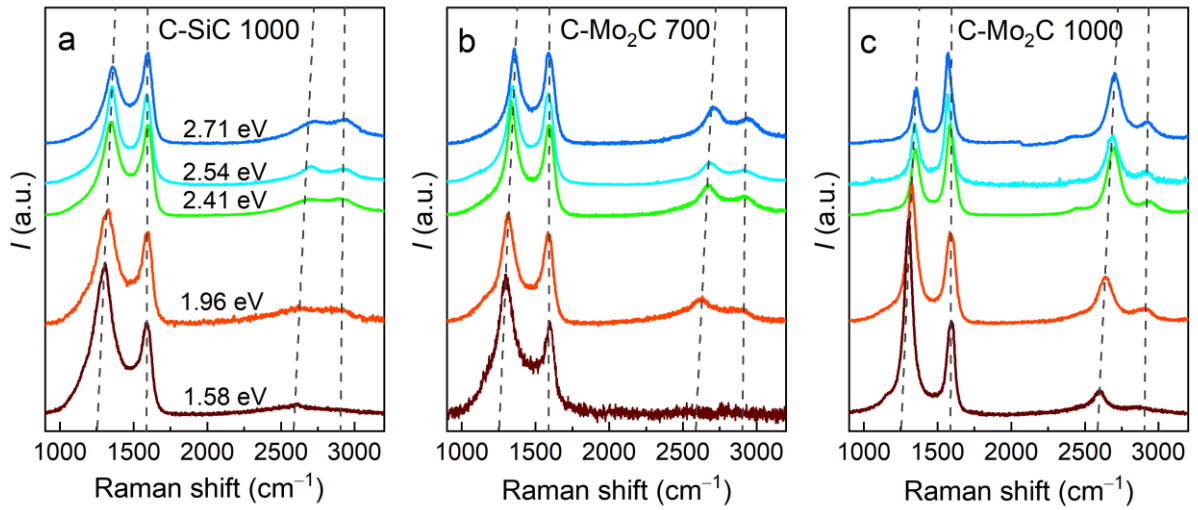

**Figure S3.** The Raman spectra of (a) C-SiC 1000, (b) C-Mo<sub>2</sub>C 700 and (c) Mo<sub>2</sub>C 1000 measured with different laser excitation energies (noted in Fig). The lines connect the band centers, emphasizing the change in the band positions.

### 2.1 Comparison of different deconvolution approaches

The difference between FWHM obtained with the 3-function (L+L+BWF) deconvolution approach and the 4- or 5-function deconvolution approaches is large for carbons synthesized at lower temperatures  $T_{\text{syn}} \leq 900$  °C (i.e. for more disordered carbons) but diminishes as the  $T_{\text{syn}}$  increases (Figure S4a–b). This is to be expected since the intensities of the Ds and Gs bands are also quite low in the Raman spectra of the CDC synthesized at  $\geq 1000$  °C (Figure 3a–c). Thus, the main differences between the 3-function and 4- or 5-function deconvolution approaches are lost.

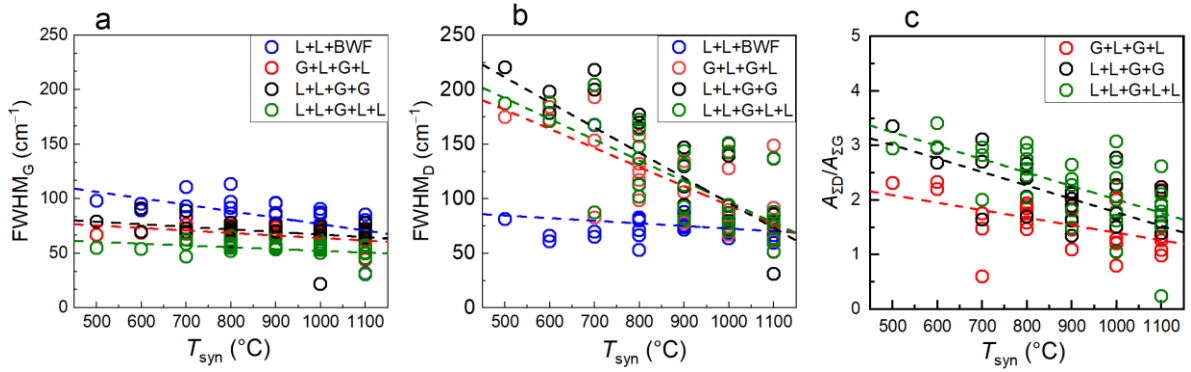

**Figure S4.** Parameters (a)  $\text{FWHM}_D$  (b)  $\text{FWHM}_G$  and (c)  $A_D/A_G$  (as expressed in Eq. 5), obtained from spectra ( $E_{\text{laser}} = 2.41$  eV) of CDCs using different deconvolution methods (noted in Figure) plotted against the synthesis temperature ( $T_{\text{syn}}$ ) of the CDC. The lines given are guides to the eye.

The deconvolution approaches which contained 4 and more distribution functions (G+L+G+L, L+L+G+G and L+L+G+L+L) resulted in a very clear dependence of the  $\text{FWHM}_D$  on the synthesis temperature (Figure 3f–h, Figure S4c). For the L+L+BWF approach, two Lorentzian shapes were fitted to the experimental D-band, denoted as D<sub>1</sub> and D<sub>2</sub> (Figure 3a). Neither the FWHM of the D<sub>1</sub> nor the FWHM of the D<sub>2</sub> demonstrates any dependence on the synthesis temperature of the CDC (Figure 3e, Figure S4c).

The L+L+G+L+L approach was the only approach, which contained the D'-band. The FWHM of the D'-band decreased with  $T_{\text{syn}}$  for most CDCs (Figure S5).

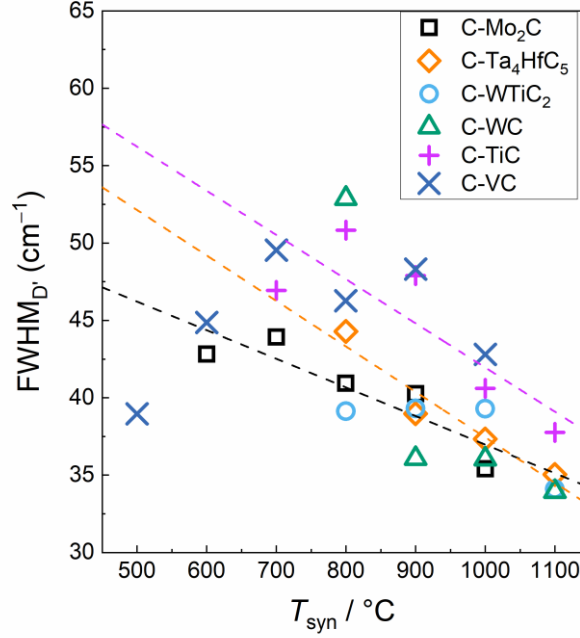

**Figure S5.** The width of the D'-band ( $\text{FWHM}_{D'}$ ) vs the synthesis temperature of the CDC (noted in Figure) obtained with the L+L+G+L+L deconvolution approach.

### 2.1 The impact of different laser excitation energy

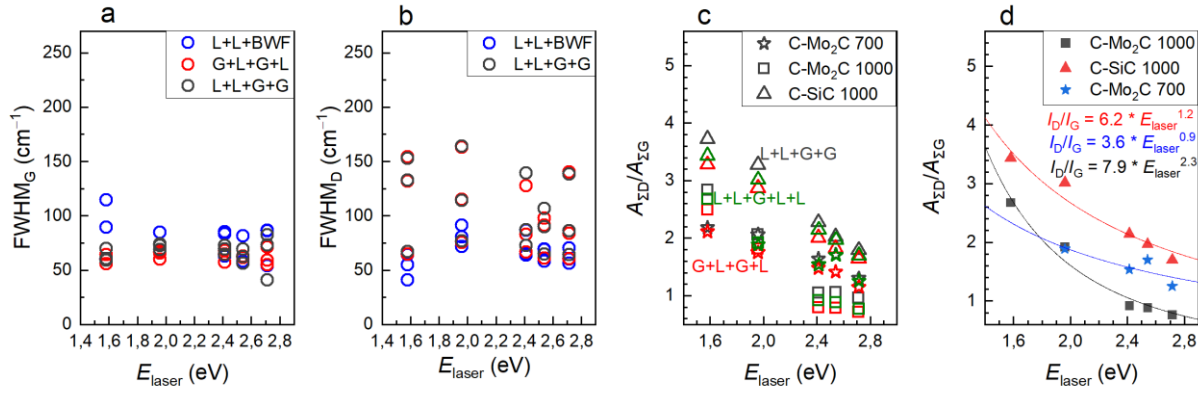

**Figure S6.** Different parameters obtained from the spectra of C-Mo<sub>2</sub>C 700, C-Mo<sub>2</sub>C 1000 and C-SiC 1000 using different deconvolution methods (noted in Figure) plotted against the excitation laser energy ( $E_{\text{laser}}$ ). Full width half maximum of the (a) G-band ( $\text{FWHM}_G$ ); (b) D-band ( $\text{FWHM}_D$ ) and (c) ratio  $A_{\Sigma D}/A_{\Sigma G}$  (as expressed in Eq. 5). The lines given are guides to the eye. (d) The ratio ratio  $A_{\Sigma D}/A_{\Sigma G}$  vs  $E_{\text{laser}}$ , where the line corresponds to the equation ratio  $A_{\Sigma D}/A_{\Sigma G} = B E_{\text{laser}}^x$ , where parameters B and x are fitted and brought in the graph.

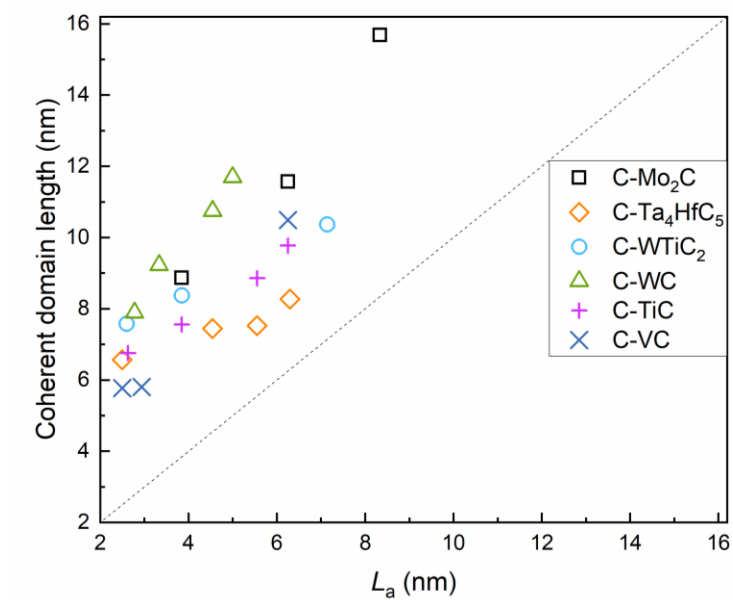

**Figure S7.** The comparison of the coherent domain length calculated from Raman spectra using ratio  $A_{\Sigma D}/A_{\Sigma G}$  and equation  $L_a = 490/E_{\text{laser}}^4 (A_{\Sigma D}/A_{\Sigma G})^{-1}$  [27] (y-axis) and the graphene domain lengths,  $L_a$ , from wide-angle X-ray scattering pattern analysis by CarbX (x-axis).
